# Supplementary material
Source: PubMed Central journal article supplement (PMC4276457)
Supplement: NIHMS640071-supplement-Supplemental_Material_File__1.pdf [file NIHMS640071-supplement-Supplemental_Material_File__1.pdf]

**SUPPLEMENTAL MATERIAL.**

**Online table I. HRs of different subtypes of stroke according to different levels of body mass index at baseline, during follow-up and at last visit among patients with type 2 diabetes**

|                        | Body mass index (kg/m <sup>2</sup> ) |                  |                  |                  |                  | P <sub>trend</sub> | Each 1 kg/m <sup>2</sup> increase |
|------------------------|--------------------------------------|------------------|------------------|------------------|------------------|--------------------|-----------------------------------|
|                        | 18.5-24.9                            | 25.0-29.9        | 30-34.9          | 35-39.9          | ≥40              |                    |                                   |
| <b>Ischemic stroke</b> |                                      |                  |                  |                  |                  |                    |                                   |
| <i>Baseline</i>        |                                      |                  |                  |                  |                  |                    |                                   |
| No. of subjects        | 3,121                                | 6,658            | 7,425            | 5,606            | 6,744            | -                  | -                                 |
| No. of cases           | 383                                  | 721              | 746              | 483              | 488              | -                  | -                                 |
| Person-years           | 25,198                               | 55,567           | 62,273           | 46,808           | 56,570           | -                  | -                                 |
| HRs (95% CI)           |                                      |                  |                  |                  |                  |                    |                                   |
| Model 1                | 1.00                                 | 0.85 (0.75-0.96) | 0.81 (0.72-0.92) | 0.74 (0.65-0.85) | 0.68 (0.59-0.78) | <0.001             | 0.985 (0.980-0.990)               |
| Model 2                | 1.00                                 | 0.87 (0.77-0.99) | 0.85 (0.75-0.96) | 0.78 (0.68-0.89) | 0.72 (0.63-0.83) | <0.001             | 0.987 (0.982-0.992)               |
| Model 3                | 1.00                                 | 0.83 (0.73-0.94) | 0.78 (0.69-0.88) | 0.71 (0.62-0.82) | 0.66 (0.58-0.76) | <0.001             | 0.984 (0.979-0.989)               |
| <i>Follow-up</i>       |                                      |                  |                  |                  |                  |                    |                                   |
| No. of subjects        | 2,959                                | 6,774            | 7,656            | 5,617            | 6,548            | -                  | -                                 |
| No. of cases           | 351                                  | 779              | 757              | 472              | 462              | -                  | -                                 |
| Person-years           | 24,127                               | 56,330           | 64,040           | 46,902           | 55,017           | -                  | -                                 |
| HRs (95% CI)           |                                      |                  |                  |                  |                  |                    |                                   |
| Model 1                | 1.00                                 | 0.97 (0.86-1.10) | 0.86 (0.76-0.98) | 0.78 (0.68-0.89) | 0.71 (0.62-0.82) | <0.001             | 0.983 (0.978-0.988)               |
| Model 2                | 1.00                                 | 0.99 (0.87-1.12) | 0.90 (0.79-1.02) | 0.82 (0.71-0.94) | 0.76 (0.66-0.87) | <0.001             | 0.985 (0.980-0.991)               |
| Model 3                | 1.00                                 | 0.94 (0.83-1.06) | 0.82 (0.72-0.94) | 0.74 (0.64-0.86) | 0.69 (0.60-0.80) | <0.001             | 0.982 (0.977-0.987)               |
| <i>Last visit</i>      |                                      |                  |                  |                  |                  |                    |                                   |
| No. of subjects        | 3,466                                | 6,825            | 7,373            | 5,405            | 6,485            | -                  | -                                 |
| No. of cases           | 449                                  | 755              | 713              | 442              | 462              | -                  | -                                 |
| Person-years           | 28,215                               | 56,980           | 61,554           | 45,318           | 54,349           | -                  | -                                 |
| HRs (95% CI)           |                                      |                  |                  |                  |                  |                    |                                   |

|                           |        |                  |                  |                  |                  |        |                     |
|---------------------------|--------|------------------|------------------|------------------|------------------|--------|---------------------|
| Model 1                   | 1.00   | 0.86 (0.76-0.96) | 0.78 (0.70-0.88) | 0.70 (0.61-0.80) | 0.66 (0.58-0.76) | <0.001 | 0.983 (0.978-0.988) |
| Model 2                   | 1.00   | 0.88 (0.78-0.99) | 0.81 (0.72-0.92) | 0.73 (0.64-0.84) | 0.70 (0.62-0.81) | <0.001 | 0.985 (0.980-0.990) |
| Model 3                   | 1.00   | 0.84 (0.75-0.94) | 0.76 (0.67-0.85) | 0.68 (0.59-0.77) | 0.65 (0.57-0.75) | <0.001 | 0.982 (0.977-0.987) |
| <b>Hemorrhagic stroke</b> |        |                  |                  |                  |                  |        |                     |
| <i>Baseline</i>           |        |                  |                  |                  |                  |        |                     |
| No. of subjects           | 3,121  | 6,658            | 7,425            | 5,606            | 6,744            | -      | -                   |
| No. of cases              | 17     | 29               | 30               | 16               | 17               | -      | -                   |
| Person-years              | 27,142 | 59,568           | 66,442           | 49,564           | 59,369           | -      | -                   |
| HRs (95% CI)              |        |                  |                  |                  |                  |        |                     |
| Model 1                   | 1.00   | 0.76 (0.42-1.37) | 0.72 (0.40-1.31) | 0.54 (0.27-1.08) | 0.53 (0.27-1.04) | 0.034  | 0.978 (0.954-1.004) |
| <i>Follow-up</i>          |        |                  |                  |                  |                  |        |                     |
| No. of subjects           | 2,959  | 6,774            | 7,656            | 5,617            | 6,548            | -      | -                   |
| No. of cases              | 17     | 29               | 32               | 13               | 18               | -      | -                   |
| Person-years              | 25,950 | 60,507           | 68,303           | 49,602           | 57,723           | -      | -                   |
| HRs (95% CI)              |        |                  |                  |                  |                  |        |                     |
| Model 1                   | 1.00   | 0.73 (0.40-1.34) | 0.74 (0.41-1.34) | 0.44 (0.21-0.90) | 0.57 (0.29-1.11) | 0.035  | 0.978 (0.952-1.004) |
| <i>Last visit</i>         |        |                  |                  |                  |                  |        |                     |
| No. of subjects           | 3,466  | 6,825            | 7,373            | 5,405            | 6,485            | -      | -                   |
| No. of cases              | 22     | 28               | 28               | 14               | 17               | -      | -                   |
| Person-years              | 30,609 | 61,075           | 65,517           | 47,832           | 57,052           | -      | -                   |
| HRs (95% CI)              |        |                  |                  |                  |                  |        |                     |
| Model 1                   | 1.00   | 0.64 (0.37-1.13) | 0.62 (0.36-1.09) | 0.45 (0.23-0.88) | 0.50 (0.26-0.95) | 0.014  | 0.975 (0.950-1.000) |

Model 1, Adjusted for age, sex and race.

Model 2, additionally adjusted for types of insurance, income, and smoking.

Model 3, model 2 and also adjusted for LDL cholesterol, SBP, HbA1c, eGFR, history of atrial fibrillation, use of antihypertensive drugs, glucose-lowering agents, and cholesterol-lowering agent.

**Online table II. HRs of stroke according to different levels of body mass index at baseline, during follow-up and at last visit after excluding patients with incident subdural hemorrhage (n=35) and patients with TIA (n=662) during follow-up**

|                                       | Body mass index (kg/m <sup>2</sup> ) |                  |                  |                  |                  | P <sub>trend</sub> | Each 1 kg/m <sup>2</sup> increase |
|---------------------------------------|--------------------------------------|------------------|------------------|------------------|------------------|--------------------|-----------------------------------|
|                                       | 18.5-24.9                            | 25.0-29.9        | 30-34.9          | 35-39.9          | ≥40              |                    |                                   |
| <b>Total Stroke<sup>†</sup></b>       |                                      |                  |                  |                  |                  |                    |                                   |
| Baseline                              | 1.00                                 | 0.87 (0.76-1.01) | 0.85 (0.74-0.98) | 0.79 (0.67-0.92) | 0.72 (0.62-0.84) | <0.001             | 0.987 (0.981-0.992)               |
| Follow-up                             | 1.00                                 | 0.97 (0.84-1.12) | 0.87 (0.75-1.00) | 0.80 (0.69-0.94) | 0.73 (0.62-0.86) | <0.001             | 0.984 (0.978-0.990)               |
| Last visit                            | 1.00                                 | 0.85 (0.74-0.96) | 0.77 (0.67-0.88) | 0.70 (0.60-0.81) | 0.67 (0.57-0.78) | <0.001             | 0.983 (0.978-0.989)               |
| <b>Ischemic Stroke<sup>†</sup></b>    |                                      |                  |                  |                  |                  |                    |                                   |
| Baseline                              | 1.00                                 | 0.89 (0.77-1.03) | 0.86 (0.75-1.00) | 0.81 (0.69-0.95) | 0.75 (0.64-0.88) | <0.001             | 0.988 (0.983-0.994)               |
| Follow-up                             | 1.00                                 | 1.00 (0.87-1.16) | 0.89 (0.77-1.03) | 0.83 (0.71-0.98) | 0.77 (0.65-0.90) | <0.001             | 0.986 (0.980-0.991)               |
| Last visit                            | 1.00                                 | 0.86 (0.76-0.99) | 0.78 (0.68-0.90) | 0.72 (0.61-0.83) | 0.70 (0.60-0.81) | <0.001             | 0.985 (0.979-0.991)               |
| <b>Hemorrhagic stroke<sup>‡</sup></b> |                                      |                  |                  |                  |                  |                    |                                   |
| Baseline                              | 1.00                                 | 0.63 (0.28-1.42) | 0.97 (0.46-2.03) | 0.54 (0.22-1.33) | 0.54 (0.22-1.32) | 0.20               | 0.983 (0.952-1.016)               |
| Follow-up                             | 1.00                                 | 0.55 (0.26-1.17) | 0.64 (0.31-1.31) | 0.54 (0.23-1.23) | 0.41 (0.17-0.99) | 0.066              | 0.976 (0.943-1.010)               |
| Last visit                            | 1.00                                 | 0.47 (0.23-0.98) | 0.65 (0.33-1.28) | 0.47 (0.21-1.06) | 0.30 (0.12-0.75) | 0.014              | 0.971 (0.938-1.004)               |

<sup>†</sup>Adjusted for age, sex, race, types of insurance, income, and smoking. <sup>‡</sup> Adjusted for age, sex and race.

**Online table III. HRs of total and different subtypes of stroke according to different levels of body mass index using time-dependent Cox model**

|                                 | Body mass index (kg/m <sup>2</sup> ) |                  |                  |                  |                  | P <sub>trend</sub> | Each 1 kg/m <sup>2</sup> increase |
|---------------------------------|--------------------------------------|------------------|------------------|------------------|------------------|--------------------|-----------------------------------|
|                                 | 18.5-24.9                            | 25.0-29.9        | 30-34.9          | 35-39.9          | ≥40              |                    |                                   |
| Total stroke <sup>†</sup>       | 1.00                                 | 0.99 (0.87-1.12) | 0.90 (0.79-1.02) | 0.80 (0.69-0.92) | 0.73 (0.63-0.83) | <0.001             | 0.983 (0.978-0.988)               |
| Ischemic stroke <sup>†</sup>    | 1.00                                 | 1.01 (0.89-1.14) | 0.91 (0.80-1.03) | 0.81 (0.70-0.93) | 0.73 (0.64-0.85) | <0.001             | 0.984 (0.979-0.989)               |
| Hemorrhagic stroke <sup>‡</sup> | 1.00                                 | 0.77 (0.42-1.40) | 0.80 (0.44-1.45) | 0.48 (0.23-1.00) | 0.64 (0.32-1.28) | 0.096              | 0.983 (0.957-1.01)                |

<sup>†</sup>Adjusted for age, sex, race, types of insurance, income, and smoking. <sup>‡</sup> Adjusted for age, sex and race.

**Online table IV. HRs of stroke according to different levels of BMI during follow-up and at last visit among various subpopulations**

|                                      | Body mass index (kg/m <sup>2</sup> ) |                  |                  |                  |                  | P <sub>trend</sub> | P <sub>interaction</sub> |
|--------------------------------------|--------------------------------------|------------------|------------------|------------------|------------------|--------------------|--------------------------|
|                                      | 18.5-24.9                            | 25.0-29.9        | 30-34.9          | 35-39.9          | ≥40              |                    |                          |
| <b>Follow-up</b>                     |                                      |                  |                  |                  |                  |                    |                          |
| <i>Race</i>                          |                                      |                  |                  |                  |                  |                    |                          |
| African American                     | 1.00                                 | 0.98 (0.83-1.15) | 0.85 (0.72-1.00) | 0.77 (0.64-0.93) | 0.78 (0.64-0.94) | <0.001             | >0.25                    |
| White                                | 1.00                                 | 0.95 (0.79-1.16) | 0.93 (0.77-1.13) | 0.83 (0.67-1.02) | 0.70 (0.57-0.87) | <0.001             |                          |
| <i>Sex</i>                           |                                      |                  |                  |                  |                  |                    |                          |
| Male                                 | 1.00                                 | 1.07 (0.89-1.29) | 0.91 (0.75-1.10) | 0.88 (0.70-1.10) | 0.65 (0.50-0.85) | 0.001              | >0.10                    |
| Female                               | 1.00                                 | 0.89 (0.75-1.05) | 0.84 (0.71-0.99) | 0.73 (0.62-0.88) | 0.72 (0.61-0.86) | <0.001             |                          |
| <i>Age groups, yr</i>                |                                      |                  |                  |                  |                  |                    |                          |
| <50                                  | 1.00                                 | 1.11 (0.87-1.40) | 0.96 (0.76-1.22) | 0.80 (0.62-1.03) | 0.74 (0.58-0.94) | 0.001              | >0.75                    |
| 50-59                                | 1.00                                 | 0.89 (0.72-1.09) | 0.80 (0.65-0.98) | 0.74 (0.59-0.93) | 0.68 (0.54-0.85) | <0.001             |                          |
| 60-94                                | 1.00                                 | 0.89 (0.72-1.09) | 0.81 (0.65-1.00) | 0.74 (0.58-0.95) | 0.64 (0.48-0.85) | 0.001              |                          |
| <i>Smoking status</i>                |                                      |                  |                  |                  |                  |                    |                          |
| Never smoking                        | 1.00                                 | 0.93 (0.77-1.12) | 0.94 (0.78-1.13) | 0.82 (0.67-1.01) | 0.83 (0.68-1.02) | 0.023              | >0.10                    |
| Past smoking                         | 1.00                                 | 1.44 (0.84-2.47) | 1.23 (0.72-2.12) | 1.36 (0.78-2.37) | 0.70 (0.38-1.29) | 0.139              |                          |
| Current smoking                      | 1.00                                 | 1.07 (0.85-1.35) | 0.87 (0.68-1.11) | 0.76 (0.57-1.02) | 0.77 (0.56-1.05) | 0.013              |                          |
| <i>HbA1c, %</i>                      |                                      |                  |                  |                  |                  |                    |                          |
| <7                                   | 1.00                                 | 0.89 (0.75-1.06) | 0.83 (0.70-0.99) | 0.69 (0.56-0.84) | 0.62 (0.51-0.77) | <0.001             | <0.01                    |
| ≥7                                   | 1.00                                 | 1.06 (0.88-1.26) | 0.93 (0.78-1.12) | 0.90 (0.74-1.09) | 0.85 (0.70-1.04) | 0.018              |                          |
| <i>Using glucose-lowering agents</i> |                                      |                  |                  |                  |                  |                    |                          |
| No                                   | 1.00                                 | 0.91 (0.75-1.10) | 0.72 (0.59-0.88) | 0.65 (0.51-0.81) | 0.63 (0.50-0.79) | <0.001             | <0.005                   |
| Oral hypoglycemic agents             | 1.00                                 | 0.90 (0.71-1.15) | 0.86 (0.67-1.10) | 0.68 (0.51-0.89) | 0.58 (0.43-0.77) | <0.001             |                          |
| Insulin                              | 1.00                                 | 1.13 (0.90-1.41) | 1.10 (0.88-1.38) | 1.04 (0.82-1.31) | 0.95 (0.75-1.21) | 0.342              |                          |
| <i>Using antihypertensive drugs</i>  |                                      |                  |                  |                  |                  |                    |                          |
| No                                   | 1.00                                 | 0.89 (0.64-1.24) | 0.92 (0.66-1.29) | 0.67 (0.45-1.02) | 0.73 (0.48-1.10) | 0.064              | >0.50                    |



|                                         |      |                  |                  |                  |                  |        |       |
|-----------------------------------------|------|------------------|------------------|------------------|------------------|--------|-------|
| No                                      | 1.00 | 1.30 (0.94-1.79) | 0.95 (0.67-1.35) | 0.75 (0.48-1.16) | 0.94 (0.62-1.41) | 0.174  |       |
| Yes                                     | 1.00 | 0.79 (0.70-0.90) | 0.76 (0.67-0.86) | 0.68 (0.59-0.78) | 0.63 (0.55-0.73) | <0.001 |       |
| <i>Using cholesterol-lowering agent</i> |      |                  |                  |                  |                  |        | >0.50 |
| No                                      | 1.00 | 0.98 (0.82-1.18) | 0.80 (0.66-0.96) | 0.65 (0.52-0.81) | 0.67 (0.54-0.83) | <0.001 |       |
| Yes                                     | 1.00 | 0.74 (0.63-0.86) | 0.73 (0.63-0.85) | 0.68 (0.57-0.80) | 0.64 (0.54-0.75) | <0.001 |       |

Adjusted for age, sex, race, income, type of insurance, and smoking status during follow-up (in the follow-up analyses) and at last visit (in the last visit analyses), other than the variable for stratification.
